# Supplementary material for: Usability Evaluation of Dashboards: A Systematic Literature Review of Tools
Source: Biomed Res Int. 2023 Feb 22;2023:9990933. doi: 10.1155/2023/9990933 (PMC9977530; doi:10.1155/2023/9990933)
Supplement: Supplementary Materials — Table A1: appraisal result of study quality for quasiexperimental studies using the JBI-M AStARI. Table A2: appraisal result of study quality for the RCT using the JBI-MAStARI. Table A3: examining dashboard evaluation criteria in included articles. Table A4: dimensions to measure usability discarded from the model. [file 9990933.f1.zip]

Archive with 3 entries (3 files):
- Appendix A (1).docx
- Appendix B (1).docx
- Appendix C (1).docx
